# Supplementary material
Source: publisher site journal article supplement (https://www.dovepress.com/article/499903)
Supplement: Supplementary file 1 [file 499903%20Revised%20Supplementary%20Tables%201-2.docx]

**Supplementary Table 1. LASSO Regression Results for Key PJI-Related Variables (Training Cohort)**

| Variables | Coefficient | Lambda.1st |
| --- | --- | --- |
| SE-IL6 | 0.19439876 | 0.02395474 |
| SE-CRP | 0.01661623 |  |
| ESR | 0.01049107 |  |
| SF-IL6 | 0.03004930 |  |
| PMN% | 0.01218965 |  |
| DD | 1.26673434 |  |
| ALB | -0.21632398 |  |

Lasso, Least Absolute Shrinkage And Selection Operator; PJI, periprosthetic joint infections; ESR, erythrocyte sedimentation rate; SE-CRP, Serum C-reactive protein; DD, D-dimer; SE-IL6, serum interleukin 6; ALB, albumin; PMN%, polymorphonuclear cell percentage; SF-IL6, synovial fluid interleukin 6

**Supplementary Table 2. Clinical Characteristics of Patients in the External Validation Cohort**

| Variables | Aseptic failure (N=56) | PJI (N=25) | *P value* |
| --- | --- | --- | --- |
| SE-IL6  Median (Q1, Q3) | 4.64(4.14, 5.71) | 7.24(6.28, 9.96) | <0.001 |
| SE-CRP  Median (Q1, Q3) | 4.34(4.01, 5.71) | 27.40(12.78, 89.77) | <0.001 |
| ESR  Median (Q1, Q3) | 20.00(14.00, 42.00) | 57.50(32.75, 91.25) | <0.001 |
| SF-IL6  Median (Q1, Q3) | 3.15(2.23, 4.88) | 10.76(6.92, 16.72) | <0.001 |
| PMN%  Median (Q1, Q3) | 52.44(39.57, 66.65) | 73.14(49.98, 83.58) | 0.007 |
| DD  Median (Q1, Q3) | 0.50(0.23, 0.71) | 1.48(1.12, 1.92) | <0.001 |
| ALB  Median (Q1, Q3) | 43.00(39.00, 44.00) | 33.50(31.00, 37.00) | <0.001 |

PJI, periprosthetic joint infections; ESR, erythrocyte sedimentation rate; SE-CRP, Serum C-reactive protein; DD, D-dimer; SE-IL6, serum interleukin 6; ALB, albumin; PMN%, polymorphonuclear cell percentage; SF-IL6, synovial fluid interleukin 6
